# Supplementary material
Source: PubMed Central journal article supplement (PMC3280606)
Supplement: Supp_Table1.pdf [file Supp_Table1.pdf]

SUPPLEMENTARY TABLE S1. DUPUYTREN'S DISEASE PATIENT DATA

| Patient | Gender | Age | Previous Surgery<br>(number of fasciectomy) | Family History |
|---------|--------|-----|---------------------------------------------|----------------|
| 1       | Male   | 75  | 20                                          | No             |
| 2       | Male   | 60  | 7                                           | Yes            |
| 3       | Male   | 61  | 0                                           | No             |
| 4       | Male   | 70  | 5                                           | No             |
| 5       | Male   | 59  | 3                                           | No             |
| 6       | Male   | 62  | 3 (+ 1 amputation)                          | No             |
| 7       | Male   | 56  | 0                                           | No             |
| 8       | Male   | 75  | 2                                           | No             |
| 9       | Male   | 65  | 2                                           | Yes            |
| 10      | Male   | 35  | 0                                           | No             |
| 11      | Male   | 66  | 0                                           | No             |
| 12      | Male   | 76  | 1                                           | No             |
| 13      | Male   | 53  | 0                                           | No             |
| 14      | Male   | 77  | 0                                           | No             |
| 15      | Male   | 71  | 0                                           | No             |
| 16      | Male   | 53  | 1                                           | Yes            |
| 17      | Male   | 69  | 0                                           | No             |
| 18      | Male   | 78  | 1                                           | Yes            |
| 19      | Male   | 59  | 1                                           | No             |
| 20      | Male   | 62  | 0                                           | No             |
| 21      | Male   | 71  | 0                                           | No             |
| 22      | Male   | 80  | 0                                           | Yes            |
| 23      | Male   | 50  | 0                                           | Yes            |
| 24      | Male   | 74  | 1                                           | Yes            |
| 25      | Male   | 60  | 0                                           | No             |
| 26      | Male   | 53  | 0                                           | Yes            |
| 27      | Female | 47  | 0                                           | No             |
